# Supplementary material for: Design of a DNA electronic logic gate (INHIBIT gate) with an assaying application for Ag+ and cysteine
Source: Royal Society of Chemistry journal article supplement (doi:10.1039/c1cc12734a), 2011-01-01
Supplement: c1cc12734a.pdf [file c1cc12734a.pdf]

## Supporting Information

1

2

### 3 Experimental Section

#### 4 Materials and chemicals

5 DNA oligonucleotides were synthesized by Sangon Inc. (Shanghai, China). Their  
6 sequences are shown below:

7 Capture ssDNA: 5'-HS-(CH<sub>2</sub>)<sub>6</sub>-CTCGCCTCTGGCCC-3' (1)

8 Probe ssDNA: 5'-NH<sub>2</sub>-GGGCCACAGGCGAG-3' (2)

9 There is a C-C mismatched base pair (in underline) in the DNA.  
10 6-mercaptohexanol (MCH) and ferrocene acetic acid were purchased from Sigma,  
11 USA. N-(3-dimethylaminopropyl)-N'-ethylcarbodiimide (EDC) and  
12 N-Hydroxysuccinimide (NHS) were received from Shanghai Medpep Co., Ltd. All  
13 other chemicals were of analytical grade.

14 All solutions were prepared with using Milli-Q reagent water (Milli-Q, Millipore,  
15 18.2-MΩ resistivity). DNA buffer solutions (the concentrations of oligonucleotides  
16 are 1 μmol/L) were obtained by dissolving oligonucleotides with a 40 mmol/L  
17 Tris-acetate buffer solution (pH 7.6) containing 100 mmol/L NaCl. Metal ion  
18 solutions were prepared from nitrate salts. All work solutions were prepared with  
19 Tris-acetate buffer solution (pH 7.6).

#### 20 Apparatus

21 All electrochemical measurements were carried out using CHI 660D  
22 electrochemical system (CH Instruments, Shanghai, China) at room temperature. A

23 three-electrode electrochemical cell was used. Gold electrode (2 mm in diameter, CH  
24 Instruments, Shanghai, China) was used as the working electrode. Platinum wire and  
25 Ag/AgCl (saturated with KCl) were used as counter electrode and reference electrode,  
26 respectively.

### 27 **Preparation of Fc-Labeled ssDNA**

28 The Fc-labeled ssDNA was synthesized according to the previously reported  
29 procedure<sup>1</sup>. Firstly, 1 mg of ferrocene acetic acid was added to 2 mL of Tris-acetate  
30 buffer solution containing EDC/NHS (0.1 mol/L each) for 2 h to activate the COOH  
31 group of ferrocene acetic acid. Then, 50  $\mu$ L of activated ferrocene acetic acid solution  
32 was mixed with 50  $\mu$ L probe ssDNA solution and reacted at room temperature  
33 overnight. After dialyzing against Tris-acetate buffer solution for 24 h (to remove  
34 excessive ferrocenecarboxylic acid), the mixture was then stored in refrigerator at 4  
35  $^{\circ}$ C for the following experiments.

### 36 **Preparation of the modified electrode**

37 A gold electrode was polished with aqueous slurries of 1.0  $\mu$ m, 0.3  $\mu$ m and 0.05  
38  $\mu$ m  $\alpha$ -Al<sub>2</sub>O<sub>3</sub> powders on a polishing microcloth and sonicated with deioned water,  
39 ethanol for 3 min, respectively. Finally, the gold electrode was rinsed with deioned  
40 water, and then electrochemically activated in by consecutively cycling in the  
41 potential range of 0 ~ +1.6 V in 0.5 mol/L sulfuric acid until a cyclic voltammogram  
42 reached, which means a clean gold electrode was obtained. The activated gold  
43 electrodes were then interacted with 0.1  $\mu$ mol/L capture ssDNA solution for 90 min,  
44 and capture ssDNA can be immobilized on the gold electrode through thiol-Au

45 interaction. And the surfaces of the gold electrodes were passivated with 1 mmol/L  
46 MCH. And then capture ssDNA-modified electrode was immersed into the 0.1  
47  $\mu\text{mol/L}$  Fc-labeled ssDNA solution for 2 h in 37 °C water bath. Thus  
48 dsDNA-modified electrode was obtained for following experiment. (Note: After each  
49 modification step, the electrode should be rinsed with deionized water or buffer solution  
50 to eliminate the physical adsorption)

51

## 52 **Electrochemical experiment**

53 The above treated gold electrode, as the working electrode, was immersed into the  
54 electrochemical cell containing 2 mL of Tris-acetate buffer solution. Here differential  
55 pulse voltammetry (DPV) was used as scan mode. The parameter was set as follow:  
56 the potential interval from 0 to +0.5 V vs. Ag/AgCl, modulation amplitude 0.05 V,  
57 pulse width 0.06 s, and sample width 0.02 s, and further incubation in different  
58 concentration of Cys for 3 h. The current intensity at about 0.23 V was used for  
59 quantification. Electrochemical impedance experiments were performed in the  
60 solution containing 5 mmol/L  $[\text{Fe}(\text{CN})_6]^{3-/4-}$  and 0.1 mol/L KCl. The biased potential  
61 was 0.214 V (vs. Ag/AgCl) and the amplitude was 5.0 mV, and the electrochemical  
62 impedance spectra were recorded in the frequency range of 10 kHz to 1 Hz.

## 63 **Ag<sup>+</sup> detection**

64 Before and after incubation of modified electrode in different concentrations of  
65 Ag<sup>+</sup> for 2 h, DPV was carried out in Tris-acetate buffer solution (pH 7.6) and the  
66 current was recorded.

## 67 Cys detection

68 After incubation in 200 nmol/L  $\text{Ag}^+$ , the modified electrode was immersed into  
69 different concentrations of Cys for 3 h, DPV was carried out in Tris-acetate buffer  
70 solution (pH 7.6) and the current was recorded. Additionally, the modified electrode  
71 was only immersed into Cys (or mixture of  $\text{Ag}^+$  and Cys) for 3 h, and then DPV was  
72 carried out in same buffer solution again, and current was recorded.

73

## 74 Characterization of the modified electrode

75 Faradic electrochemical impedance spectroscopy (EIS) is employed to investigate  
76 the interface properties of the gold electrode surface during stepwise modifications.  
77 Fig. S1 shows Nyquist plots of different modified electrodes in 5 mmol/L  $\text{Fe}(\text{CN})_6^{3-/4-}$   
78 solution containing 0.1 mol/L KCl. The equivalent circuit, as the model for the  
79 working electrode, (shown in the inset of Fig. S1), is used to fit the EIS data. This  
80 equivalent circuit consists of the electrolyte solution resistance  $R_s$ , the surface electron  
81 transfer resistance  $R_{ct}$  ( $R_{ct}$  reflects the surface condition of the gold electrode surface),  
82 the Warburg impedance  $Z_w$  and the constant phase element related to double layer  
83 capacitance  $C_{dl}$ .<sup>2</sup> For bare gold electrode (curve a, 45.7  $\Omega$ ), the EIS exhibits a very  
84 small semicircular domain, indicating a fast electron-transfer process at such electrode.  
85 Immobilization of capture ssDNA results in a larger  $R_{ct}$  value (curve b, 168.4 $\Omega$ ), the  
86 reason lies in that the negatively charged phosphate backbone of the oligonucleotides  
87 immobilized on the gold electrode prevented the negatively charged redox probe  
88  $\text{Fe}(\text{CN})_6^{3-/4-}$  from reaching the gold electrode and inhibited interfacial charge transfer.

89 Using MCH to block the left bare sites on gold electrode surface resulted in the  
90 further increase of  $R_{ct}$  (curve c, 501.4 $\Omega$ ). When capture ssDNA hybridized with  
91 probe ssDNA, there is a remarkable increasment of the negative charges on the gold  
92 electrode surface, which results in much larger enhancement of  $R_{ct}$  (curve d, 698.9 $\Omega$ ).  
93 These results show that DNA can well immobilize and hybridize on the gold  
94 electrode.

95

## 96 **References**

97 1 S. Takenaka, Y. Uto, H. Kondo, T. Ihara and M. Takagi, *Anal. Biochem.*, 1994, **218**,  
98 436.

99 2 F. Patolsky, A. Lichtenstein and I. Willner, *J. Am. Chem. Soc.*, 2001, **123**, 5194.

100

101

102

103

104

105

106

107

108

109

110

111

112

113

114

115

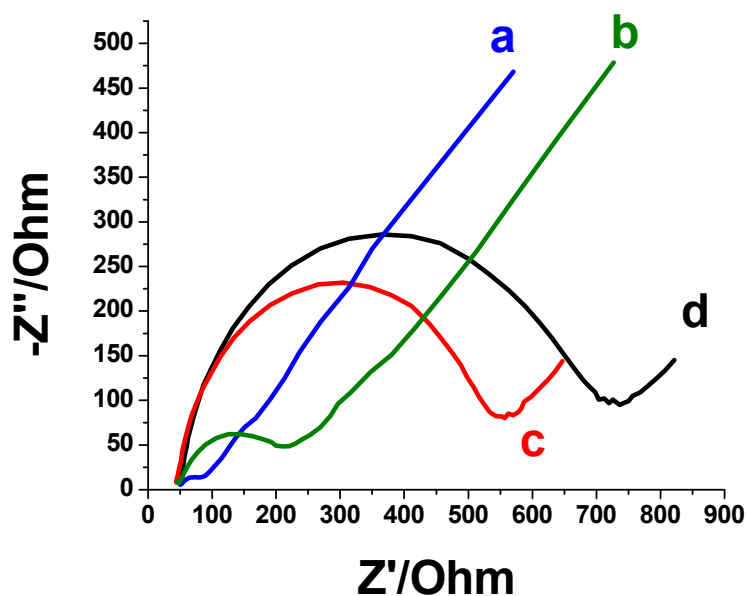

116

117 **Fig. S1** Nyquist plots of the different electrodes in the 5.0 mmol/L  $[\text{Fe}(\text{CN})_6]^{3-/4-}$   
118 solution containing 0.5 mol/L KCL. (a) Bare gold electrode; (b) Capture  
119 ssDNA-modified electrode; (c) Capture ssDNA/MCH-modified electrode; (d)  
120 Mismatch dsDNA/MCH-modified electrode. The biasing potential is 0.218 V with 5  
121 mV alternative voltage in the frequency range of 1Hz-10kHz. Inset shows the  
122 equivalent circuit.

123

124

125

126

127

128

129

130

131

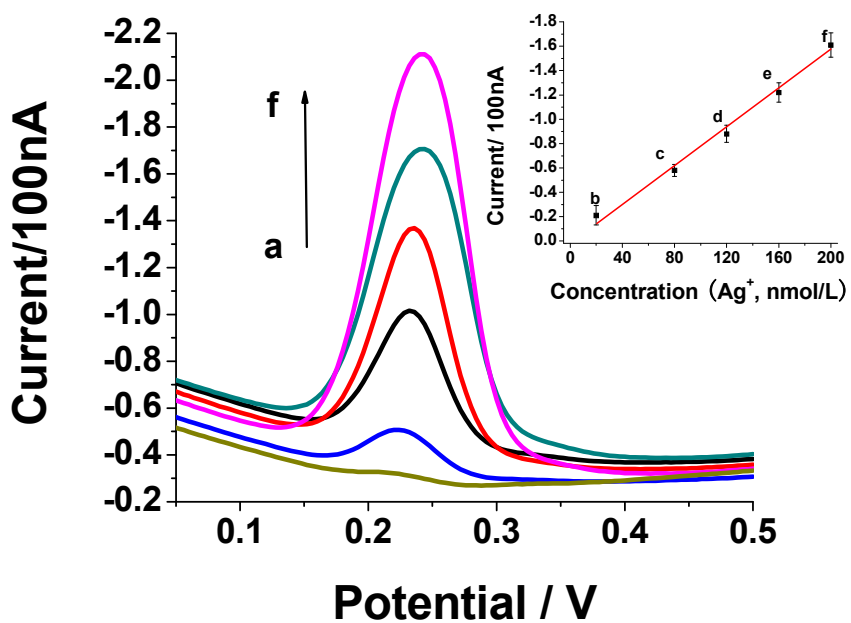

132

133 **Fig. S2** DPVs upon interaction of mismatched dsDNA-modified electrode with

134 different concentrations of  $\text{Ag}^+$  in Tris-acetate buffer solution (pH 7.6).

135 Concentrations of  $\text{Ag}^+$  are (a) 0; (b) 20, (c) 80; (d) 120; (e) 160; (f) 200 nmol/L,

136 respectively. Inset: plot of current intensity vs concentrations of  $\text{Ag}^+$ .

137

138

139

140

141

142

143

144

145

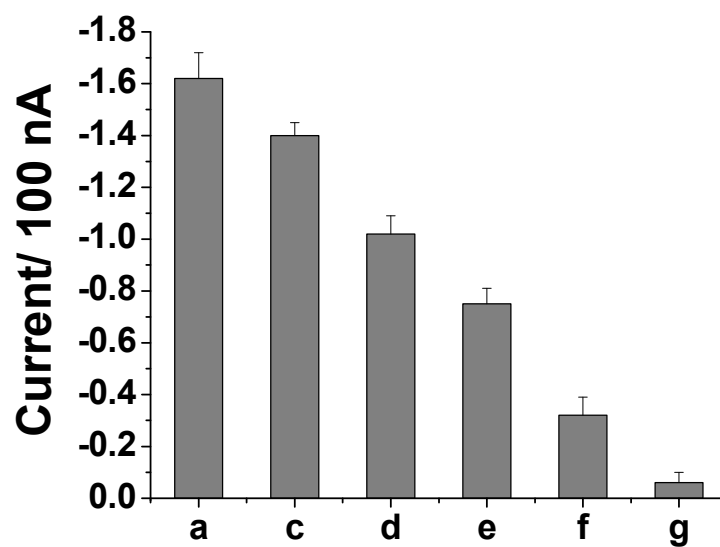

146

147 **Fig. S3** Cys concentration-dependent change in current intensity of 200 nmol/L

148  $\text{Ag}^+$ -mediated dsDNA-modified electrode in Tris-acetate buffer solution (pH 7.6).

149 Concentrations of Cys are (a) 0; (b) 35, (c) 60; (d) 80; (e)130; (f) 200 nmol/L,

150 respectively.

151
